# Supplementary material for: Variability in porcine microRNA genes and its association with mRNA expression and lipid phenotypes
Source: PubMed Central journal article supplement (PMC8097994; doi:10.1186/s12711-021-00632-3), 2021-05-04

## **Variability in porcine microRNA genes and its association with mRNA expression and lipid phenotypes**

Emilio Mármol-Sánchez<sup>1</sup>, María Gracia Luigi-Sierra<sup>1</sup>, Anna Castelló<sup>1,4</sup>, Dailu Guan<sup>1</sup>, Raquel Quintanilla<sup>2</sup>, Raul Tonda<sup>3</sup>, Marcel Amills<sup>1,4</sup>

<sup>1</sup>Centre for Research in Agricultural Genomics (CRAG), CSIC-IRTA-UAB-UB, Universitat Autònoma de Barcelona, 08193 Bellaterra, Spain.

<sup>2</sup>Animal Breeding and Genetics Program, Institute for Research and Technology in Food and Agriculture (IRTA), Torre Marimon, 08140 Caldes de Montbui, Spain.

<sup>3</sup>CNAG-CRG, Centre for Genomic Regulation (CRG), Barcelona Institute of Science and Technology (BIST), Barcelona, Spain.

<sup>4</sup>Departament de Ciència Animal i dels Aliments, Universitat Autònoma de Barcelona, 08193 Bellaterra, Barcelona, Spain.

**Corresponding autor:** Marcel Amills. <sup>1</sup>Centre for Research in Agricultural Genomics (CRAG), CSIC-IRTA-UAB-UB, Universitat Autònoma de Barcelona, 08193 Bellaterra, Spain. Phone: +34 935636600. Email: Marcel.Amills@uab.es

**Additional file 4: Fig. S1:** Sequence homology between 12 porcine miRNAs harboring SNPs that have been genotyped in the Lipgen population (N = 345) and their corresponding human miRNA orthologous sequences.

|                 |                           |                 |                            |
|-----------------|---------------------------|-----------------|----------------------------|
| hsa-miR-339-5p  | UCCUGUCUCCAGGAGCUCACG<br> | hsa-miR-326     | CCUCUGGGCCCUUCCUCCAG<br>   |
| ssc-miR-339     | UCCUGUCUCCAGGAGCUCA       | ssc-miR-326     | CCUCUGGGCCCUUCCUCCAG       |
| hsa-miR-130a-3p | CAGUGCAAUGUAAAAGGGCAU<br> | hsa-miR-34c-5p  | AGGCAGUGUAGUAGCUGAUUGC<br> |
| ssc-miR-130a    | CAGUGCAAUGUAAAAGGGCAU     | ssc-miR-34c     | AGGCAGUGUAGUAGCUGAUUGC     |
| hsa-miR-23a-3p  | AUCACAUUGCCAGGGAUUUCC<br> | hsa-miR-378a-3p | ACUGGACUUGGAGUCAGAAGGC<br> |
| ssc-miR-23a     | AUCACAUUGCCAGGGAUUUCC     | ssc-miR-378-2   | ACUGGACUUGGAGUCAGAAGGC     |
| hsa-miR-30d-5p  | UGUAAACAUCCCGACUGGAAG<br> | hsa-miR-15b-5p  | UAGCAGCAUCAUGGUUUACA<br>   |
| ssc-miR-30d     | UGUAAACAUCCCGACUGGAAG     | ssc-miR-15b     | UAGCAGCAUCAUGGUUUACA       |
| hsa-miR-371a-5p | ACUCAACUGUGGGGGCACU<br>   | hsa-miR-486-5p  | UCCUGUACUGAGCUGCCCCGAG<br> |
| ssc-miR-371-5p  | ACUCAACUGUGGGGGCACUUU     | ssc-miR-486     | UCCUGUACUGAGCUGCCCCGAG     |
| hsa-miR-429     | UAAUACUGUCUGUAAAACCGU<br> | hsa-miR-335-5p  | UCAAGAGCAAUAACGAAAAAUG<br> |
| ssc-miR-429     | UAAUACUGUCUGUAAUGCCGU     | ssc-miR-335     | UCAAGAGCAAUAACGAAAAAUG     |

**Additional file 8: Fig. S2:** Number of SNPs present in each of the annotated porcine miRNA loci that display at least 1 SNP.

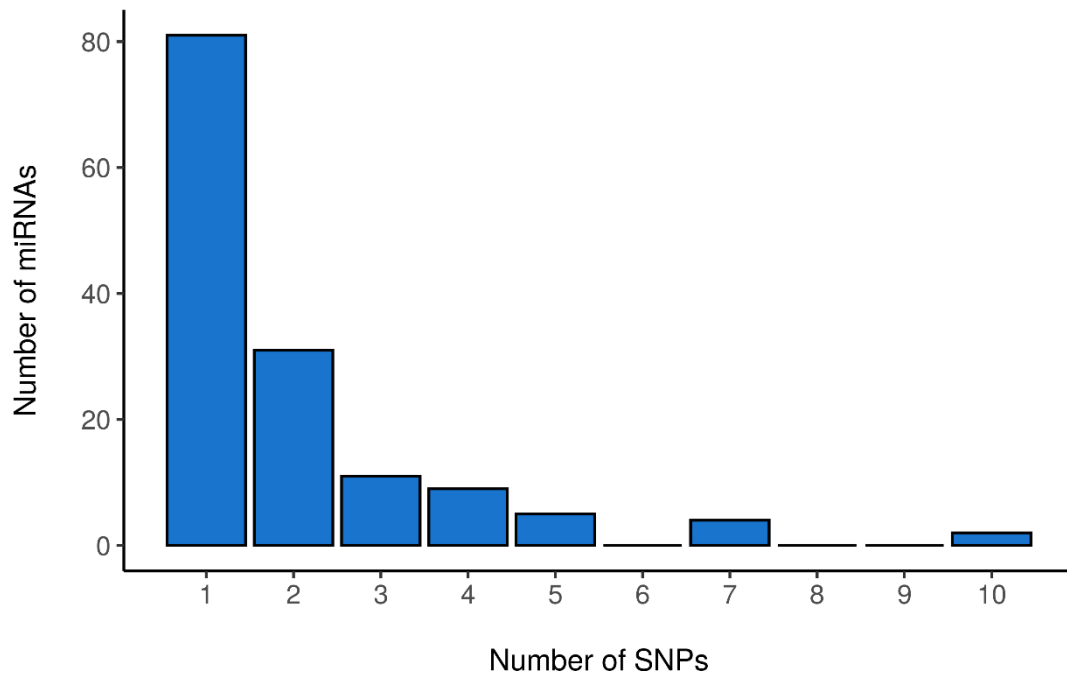

**Additional file 9: Fig. S3:** Venn Diagrams illustrating the sharing of SNPs located at the (a) *precursor*, (b) *mature* and (c) *seed* regions of miRNA loci among Asian domestic pigs (ADM), Asian wild boars (AWB), European domestic pigs (EDM) and European wild boars (EWB).

a

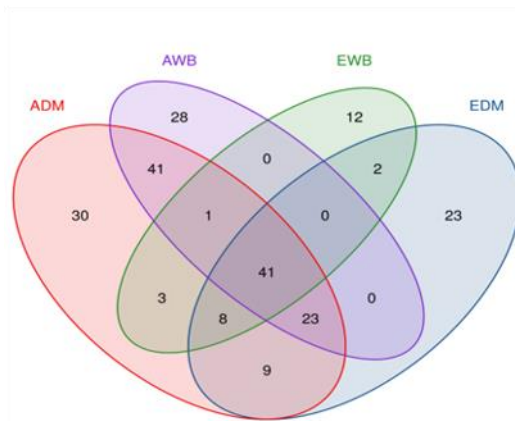

b

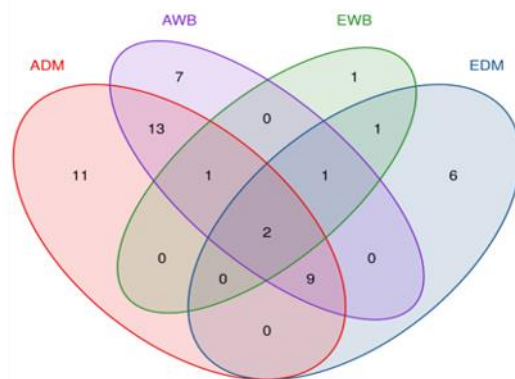

c

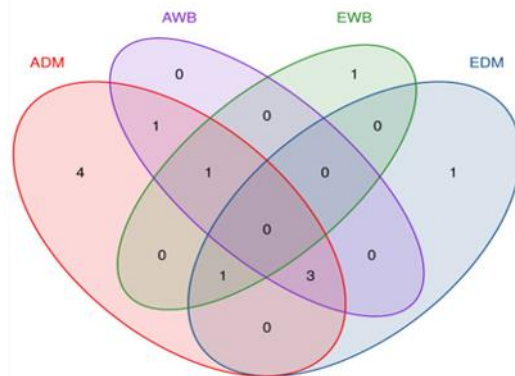

**Additional file 12: Fig. S4:** Boxplot distribution depicting whole-genome sequencing statistics for the five Duroc boars that sired the Lipgen population (N = 345).

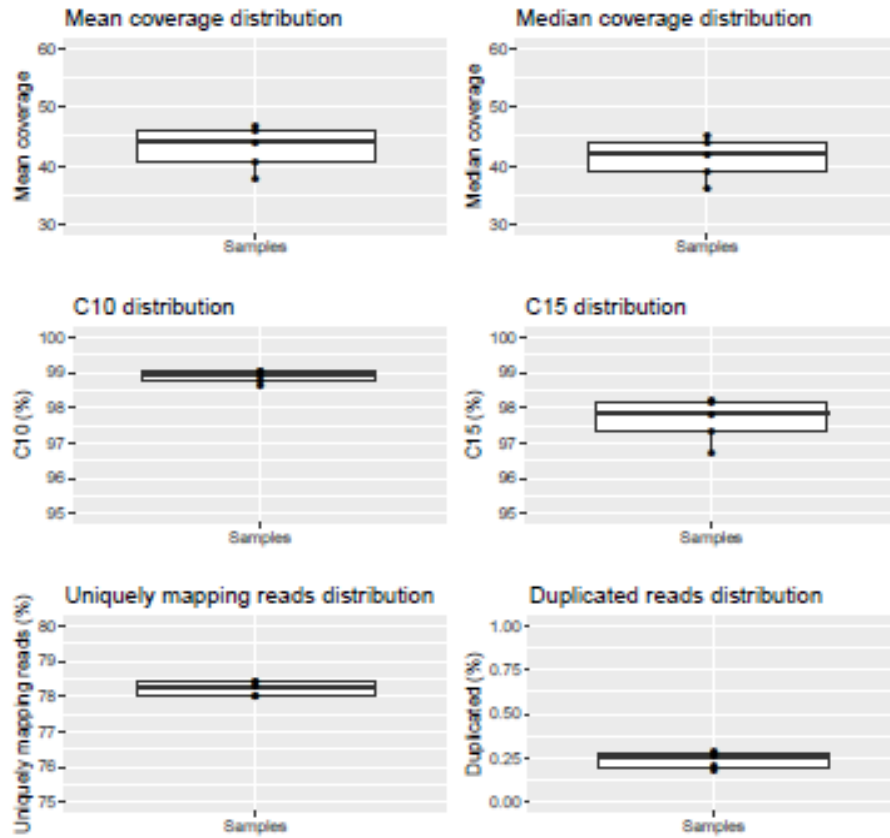

Supplement: 12711_2021_632_MOESM4_ESM.pdf [file 12711_2021_632_MOESM4_ESM.pdf]
